# Supplementary material
Source: ML conference proceedings conference paper supplement (https://proceedings.neurips.cc/paper_files/paper/2017/hash/4fa177df22864518b2d7818d4db5db2d-Abstract.html)
Supplement: Supplementary file [file 4fa177df22864518b2d7818d4db5db2d-Supplemental.zip]

---

# Supplement to Action Centered Contextual Bandits

---

**Kristjan Greenewald**  
Department of Statistics  
Harvard University  
kgreenewald@fas.harvard.edu

**Ambuj Tewari**  
Department of Statistics  
University of Michigan  
tewaria@umich.edu

**Predrag Klasnja**  
School of Information  
University of Michigan  
klasnja@umich.edu

**Susan Murphy**  
Departments of Statistics and Computer Science  
Harvard University  
samurphy@fas.harvard.edu

## 1 HeartSteps feature list

Figure 1 shows the features available to the bandit in the HeartSteps study dataset, and Figure 2 shows the estimated average regret results with errorbars.

| Feature                        | Description                                                                                                          | Purpose                                   | Interaction | Baseline Model |
|--------------------------------|----------------------------------------------------------------------------------------------------------------------|-------------------------------------------|-------------|----------------|
| Number of messages sent        | Total number of messages sent to user in prior week                                                                  | Modeling habituation to intervention      | Y           | Y              |
| Location indicator 1           | 1 if not at home or work, 0 o.w.                                                                                     | Location relevant to availability to walk | Y           | Y              |
| Location indicator 2           | 1 if at work, 0 o.w.                                                                                                 |                                           | Y           | Y              |
| Step count variability         | Historical standard deviation of step counts in 60 minute window surrounding decision point, taken over prior 7 days | Responsiveness in different times of day  | Y           | Y              |
| Steps in prior 30 minutes      | Step count in 30 minutes prior to decision point                                                                     | Measure of recent activity                |             | Y              |
| Square root of steps yesterday | Square root of the total step count yesterday                                                                        | Recent commitment/ engagement             |             | Y              |
| Outdoor Temperature            | Degrees Celsius                                                                                                      | Cold weather potentially less appealing   |             | Y              |

Figure 1: List of features available to the bandit in the HeartSteps experiment. The features available to model the action interaction (effect of sending an anti-sedentary message) and to model the baseline (reward under no action) are denoted via a “Y” in the corresponding column.

### 1.1 Simulation model

Figure 3 shows the coefficients  $\theta$  used in the main text simulations. The coefficients shown in the figure associated with the first action are obtained via a linear regression analysis of the binary action (sending or not sending a message) HeartSteps intervention data, and the coefficients for the second action are a simple modification of those.

For the time varying simulation, Gaussian processes were used to generate the reward coefficient sequence  $\eta_t$  and the state sequence  $\bar{s}_t$ . We used Gaussian processes since if  $\eta_t$  is IID, then the baseline reward becomes an IID random variable, making the baseline reward not time varying.

We used the Gaussian process

$$\eta_t = \sqrt{1 - \rho^2} \eta_{t-1} + \rho n_t$$

where  $\eta_0 = 1_7$ ,  $n_t \sim \mathcal{N}(0, I_7)$ , and  $\rho = 0.1$ . The state sequence  $\bar{s}_t$  was generated in the same manner.

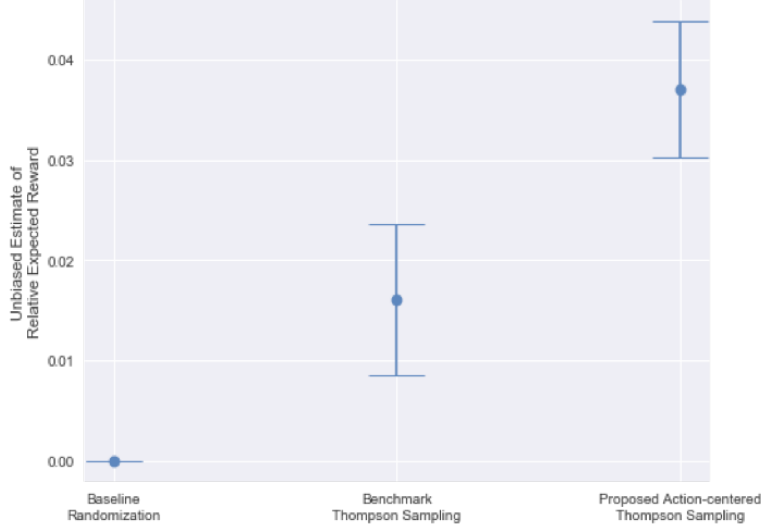

Figure 2: Unbiased estimates of the average reward received by the benchmark Thompson sampling contextual bandit and the proposed action-centered Thompson sampling contextual bandit, relative to the reward received under the pre-specified HeartSteps randomization policy. Also shown are one standard deviation error bars for the computed estimates. The superior performance of the action-centering approach is indicative of its robustness to the high complexity of the baseline subject behavior.

| Feature                 | Action 1 coef. | Action 2 coef. |
|-------------------------|----------------|----------------|
| Number of messages sent | .116           | .116           |
| Location indicator 1    | -.275          | .275           |
| Location indicator 2    | -.233          | -.233          |
| Step count variability  | .0425          | .0425          |

Figure 3: Effect coefficients, based on HeartSteps data, used for simulation reward model.

## 2 Definitions

In order to proceed with the proof of Theorem 1, we make the following definitions.

**Definition 1.** Define a filtration  $\mathcal{F}_{t-1} = \{\mathcal{H}_{t-1}, \bar{s}_t\}$  as the union of the history and current context.

**Definition 2.** Let

$$z_{t,a} = \sqrt{s_{t,a}^T B(t)^{-1} s_{t,a}},$$

for all  $a = 1, \dots, N$ .

**Definition 3.** Define  $\ell(T) = R\sqrt{d \log(T^3) \log(1/\delta)} + 1$ ,  $v = R\sqrt{\frac{24}{\epsilon} d \log(1/\delta)}$ , and  $g(T) = \sqrt{4d \log(Td)v} + \ell(T)$ .

We divide the arms  $\bar{a} > 0$  into saturated and unsaturated actions.

**Definition 4** (Saturated vs. unsaturated actions). Any arm  $\bar{a} > 0$  for which  $g(T)z_{t,\bar{a}} < \ell(T)z_{t,\bar{a}^*}$  is called a saturated arm. If an arm is not saturated, it is called unsaturated. Let  $C(t) \subseteq \{1, \dots, N\}$  be the subset of saturated arms at time  $t$ .

Observe that the optimal arm  $\bar{a}^*$  is unsaturated by definition.

We can now state the required concentration events and present bounds on the probability they occur.

### 2.1 Concentration events

**Definition 5.** Let  $E^\mu(t)$  be the event that for all  $\bar{a} = 1, \dots, N$

$$|s_{t,\bar{a}}^T \hat{\theta}_t - s_{t,\bar{a}}^T \theta| \leq \ell(T)z_{t,\bar{a}}.$$

Similarly, let  $E^\theta(t)$  be the event that for all  $\bar{a} = 1, \dots, N$

$$|s_{t,\bar{a}}^T \theta'_t - s_{t,\bar{a}}^T \hat{\theta}_t| \leq \sqrt{4d \log(Td)} v z_{t,\bar{a}}$$

and  $E_0^\theta(t)$  be the corresponding event that for all  $\bar{a} = 1, \dots, N$

$$|s_{t,\bar{a}}^T \tilde{\theta}_t - s_{t,\bar{a}}^T \hat{\theta}_t| \leq \sqrt{4d \log(Td)} v z_{t,\bar{a}}$$

We can bound the probabilities of the events  $E^\theta(t)$ ,  $E^\theta(t)_0$ , and  $E^\mu(t)$  in the following lemmas. Observe that by definition  $\mathbb{P}(E^\theta(t)|\mathcal{F}_{t-1}) = \mathbb{P}(E^\theta(t)_0|\mathcal{F}_{t-1})$ .

**Lemma 1** (Agrawal & Goyal (2013)). *For all  $t$ , and possible filtrations  $\mathcal{F}_{t-1}$ ,  $\mathbb{P}(E^\theta(t)|\mathcal{F}_{t-1}) \geq 1 - \frac{1}{T^2}$ .*

For  $E^\mu(t)$  we have

**Lemma 2.** *For all  $t$ ,  $0 < \delta < 1$ ,  $\mathbb{P}(E^\mu(t)) \geq 1 - \frac{\delta}{T^2}$ .*

The proof is given in Section 7.

## 2.2 Supermartingales

**Definition 6** (Supermartingale). *A sequence of random variables  $(Y_t; t \geq 0)$  is called a supermartingale corresponding to a filtration  $\mathcal{F}_t$  if, for all  $t$ ,  $Y_t$  is  $\mathcal{F}_t$ -measurable, and*

$$\mathbb{E}[Y_t - Y_{t-1} | \mathcal{F}_{t-1}] \leq 0$$

for all  $t \geq 1$ .

**Lemma 3** (Azuma-Hoeffding inequality). *If for all  $t = 1, \dots, T$  a supermartingale  $(Y_t; t \geq 0)$  corresponding to filtration  $\mathcal{F}_t$  satisfies  $|Y_t - Y_{t-1}| \leq c_t$  for some constants  $c_t$ , then for any  $a \geq 0$*

$$\mathbb{P}(Y_T - Y_0 \geq a) \leq e^{-\frac{a^2}{2 \sum_{t=1}^T c_t^2}}.$$

## 3 Preliminary results

### 3.1 Lemma 5: Probability of choosing a saturated action $\bar{a}_t \in C(t)$

**Lemma 4** (Agrawal & Goyal (2013) Lemma 2). *For any filtration  $\mathcal{F}_{t-1}$  such that  $E^\mu(t)$  is true,*

$$\mathbb{P}(s_{t,\bar{a}_t}^T \theta' > s_{t,\bar{a}_t}^T \theta + \ell(T) z_{t,\bar{a}_t} | \mathcal{F}_{t-1}) \geq \frac{1}{4e\sqrt{\pi T^\epsilon}}.$$

We can now prove the following.

**Lemma 5.** *For any filtration  $\mathcal{F}_{t-1}$  such that  $E^\mu(t)$  is true,*

$$\mathbb{P}(\bar{a}_t \in C(t) | \mathcal{F}_{t-1}) \leq \frac{1}{p} \mathbb{P}(\bar{a}_t \notin C(t) | \mathcal{F}_{t-1}) + \frac{1}{pT^2},$$

where  $p = \frac{1}{4e\sqrt{\pi T^\epsilon}}$ .

*Proof.* Recall that  $\bar{a}_t$  is the action with the largest value of  $s_{t,\bar{a}_t}^T \theta'$ . Hence, if  $s_{t,\bar{a}_t}^T \theta'$  is larger than  $s_{t,i}^T \theta'$  for all  $i \in C(t)$ , then  $\bar{a}_t$  is one of the unsaturated actions. Hence

$$\mathbb{P}(\bar{a}_t \notin C(t) | \mathcal{F}_{t-1}) \geq \mathbb{P}(s_{t,\bar{a}_t}^T \theta' > s_{t,i}^T \theta', \forall i \in C(t) | \mathcal{F}_{t-1}). \quad (1)$$

We know that by definition all saturated arms  $i \in C(t)$  have  $g(T) z_{t,j} < \ell(T) z_{t,\bar{a}_t}$ . Given an  $\mathcal{F}_{t-1}$  such that  $E^\mu(t)$  holds, we have that either  $E^\theta(t)$  is false or for all  $i \in C(t)$

$$s_{t,i}^T \theta' \leq s_{t,i}^T \theta + g(T) z_{t,i} \leq s_{t,\bar{a}_t}^T \theta + \ell(T) z_{t,\bar{a}_t}$$

implying

$$\begin{aligned}
& \mathbb{P}(s_{t,\bar{a}_t}^T \theta' > s_{t,i}^T \theta', \forall j \in C(t) | \mathcal{F}_{t-1}) \\
& \geq \mathbb{P}(s_{t,\bar{a}_t}^T \theta' > s_{t,\bar{a}_t}^T \theta + \ell(T) z_{t,\bar{a}_t} | \mathcal{F}_{t-1}) - \mathbb{P}(\overline{E^\theta(t)} | \mathcal{F}_{t-1}) \\
& \geq p - \frac{1}{T^2}.
\end{aligned}$$

where we have used the definitions of  $E^\mu(t)$ ,  $E^\theta(t)$ , and the last inequality follows from Lemma 4 and Lemma 2. Substituting into (1) gives

$$\mathbb{P}(\bar{a}_t \notin C(t) | \mathcal{F}_{t-1}) + \frac{1}{T^2} \geq p,$$

and

$$\frac{\mathbb{P}(\bar{a}_t \in C(t) | \mathcal{F}_{t-1})}{\mathbb{P}(\bar{a}_t \notin C(t) | \mathcal{F}_{t-1}) + \frac{1}{T^2}} \leq \frac{1}{p}.$$

□

### 3.2 Lemma 7 - Bound on $\sum_t z_{t,\bar{a}_t}$

**Lemma 6.** For  $z_{t,a} = \sqrt{s_{t,a}^T B(t)^{-1} s_{t,a}}$ , we have that

$$\sum_{t=1}^T z_{t,\bar{a}_t} \leq \frac{5}{C_\pi} \sqrt{dT \log T},$$

where  $C_\pi = \sqrt{\min(\pi_{\min}(1 - \pi_{\max}), \pi_{\max}(1 - \pi_{\min}))}$  is a constant.

*Proof.* We apply the following lemma from Auer et al. (2002) and Chu et al. (2011).

**Lemma 7.** Let  $A_t = I + \sum_{t=1}^T x_t x_t^T$ , where  $x_t \in \mathbb{R}^d$  is a sequence of vectors. Then, defining  $\sigma_t = \sqrt{x_t^T A_t^{-1} x_t}$ , we have

$$\sum_{t=1}^T \sigma_t \leq 5 \sqrt{dT \log T}.$$

To apply this to  $\sum_t z_{t,\bar{a}_t}$ , let  $x_t = \sqrt{\pi_t(1 - \pi_t)} s_{t,\bar{a}_t}$ . Then  $A_t = I + \sum_{t=1}^T (\pi_t(1 - \pi_t)) s_{t,\bar{a}_t} s_{t,\bar{a}_t}^T = B_t$ , and we have

$$\sigma_t = \sqrt{x_t^T A_t^{-1} x_t} = \sqrt{\pi_t(1 - \pi_t)} \sqrt{s_{t,\bar{a}_t}^T B_t^{-1} s_{t,\bar{a}_t}} = \sqrt{\pi_t(1 - \pi_t)} z_{t,\bar{a}_t}.$$

Applying Lemma 7 we thus have

$$\sum_{t=1}^T z_{t,\bar{a}_t} \leq \max_t \left( \frac{1}{\sqrt{\pi_t(1 - \pi_t)}} \right) \sum_{t=1}^T \sigma_t \leq \frac{5}{C_\pi} \sqrt{dT \log T},$$

where  $C_\pi = \sqrt{\min(\pi_{\min}(1 - \pi_{\max}), \pi_{\max}(1 - \pi_{\min}))}$  is a constant. □

## 4 Proof of Lemma 1 - term I

*Proof.* We know that by definition of the optimal policy,  $(\pi_t^* - \pi_t) s_{t,\bar{a}_t}^T \theta \geq 0$ . Hence under event  $E^\mu(t)$ ,

$$\begin{aligned}
(\pi_t^* - \pi_t) s_{t,\bar{a}_t}^T \theta & \leq \mathbb{P}(\text{sign}(s_{t,\bar{a}_t}^T \theta') \neq \text{sign}(s_{t,\bar{a}_t}^T \theta)) |s_{t,\bar{a}_t}^T \theta| \\
& \leq \min[|s_{t,\bar{a}_t}^T \theta|, \mathbb{P}(\text{sign}(s_{t,\bar{a}_t}^T \theta') \neq \text{sign}(s_{t,\bar{a}_t}^T \theta))] \\
& \leq (\ell(T) + \sqrt{4d \log(Td)v}) z_{t,\bar{a}_t} + 1 - \mathbb{P}(E_0^\theta(t)).
\end{aligned}$$

Substituting in the definitions of  $\ell(T)$ ,  $v$  and the bound in Lemma 1 on  $\mathbb{P}(E_0^\theta(t))$ , we have

$$\begin{aligned} (\pi_t^* - \pi_t) s_{t,\bar{a}_t}^T \theta &\leq \left( R \sqrt{d \log(T^3) \log(1/\delta)} + 1 + \sqrt{4d \log(Td)} R \sqrt{\frac{24}{\epsilon} d \log(1/\delta)} \right) z_{t,\bar{a}_t} + \frac{1}{T^2} \\ &\leq C \sqrt{\frac{d^2}{\epsilon} \log(1/\delta)} z_{t,\bar{a}_t} + \frac{1}{T^2}. \end{aligned}$$

Summing over  $t$  and recalling that by Lemma 7  $\sum_{t=1}^T z_{t,\bar{a}_t} \leq \frac{5}{C_\pi} \sqrt{dT \log T}$ , we have that under event  $E^\mu(t)$

$$\begin{aligned} I &= \sum_{t=1}^T (\pi_t^* - \pi_t) s_{t,\bar{a}_t}^T \theta \\ &\leq \frac{C}{C_\pi} \sqrt{d^3 T \log(Td) \log(1/\delta)}. \end{aligned}$$

Since the probability that  $E^\mu(t)$  holds is at least  $1 - \frac{\delta}{T^2}$  by Lemma 2, the lemma results.  $\square$

## 5 Proof of Lemma 2: Bound on term II

Before commencing the proof, we first state the following result from Abbasi-Yadkori et al. (2011).

**Lemma 8** (Abbasi-Yadkori et al. (2011)). *Let  $(\mathcal{F}'_t; t \geq 0)$  be a filtration,  $(m_t; t \geq 1)$  be an  $\mathbb{R}^d$ -valued stochastic process such that  $m_t$  is  $(\mathcal{F}'_{t-1})$ -measurable,  $(\eta_t; t \geq 1)$  be a real-valued martingale difference process such that  $\eta_t$  is  $(\mathcal{F}'_t)$ -measurable. For  $t \geq 0$ , define  $\xi_t = \sum_{\tau=1}^t m_\tau \eta_\tau$  and  $M_t = I_d + \sum_{\tau=1}^t m_\tau m_\tau^T$ , where  $I_d$  is the  $d$ -dimensional identity matrix. Assume  $\eta_t$  is conditionally  $R$ -sub-Gaussian.*

*Then, for any  $\delta' > 0$ ,  $t \geq 0$ , with probability at least  $1 - \delta'$ ,*

$$\|\xi_t\|_{M_t^{-1}} \leq R \sqrt{d \log \left( \frac{t+1}{\delta'} \right)},$$

where  $\|\xi_t\|_{M_t^{-1}} = \sqrt{\xi_t^T M_t^{-1} \xi_t}$ .

We now prove Lemma 2.

*Proof.* Defining  $\text{regret}'(t) = (s_{t,\bar{a}_t}^T \theta - s_{t,\bar{a}_t^*}^T \theta) I(E^\mu(t))$ , we have the following lemma, which we prove in Section 6.

**Lemma 9.** *Let, for  $p = \frac{1}{4e\sqrt{\pi T \epsilon}}$ ,*

$$X_t = \text{regret}'(t) - \frac{g(T)}{p} I(a(t) \notin C(t)) z_{t,\bar{a}_t^*} \quad (2)$$

$$Y_t = \sum_{w=1}^t X_w. \quad (3)$$

*Then  $(Y_t; t = 0, \dots, T)$  is a super-martingale process with respect to filtration  $\mathcal{F}_t$ .*

Given our results in Section 7.1 and our concentration bounds, the proof is closely related to Agrawal & Goyal (2013) and is listed in Section 6.

Using the definition of  $X_t$ , we have that  $|Y_t - Y_{t-1}| \leq |X_t| \leq 1 + \frac{g(T)}{p} + \frac{2g(T)^2}{\ell(T)} + \frac{2g(T)}{pT^2} \leq \frac{8}{p} \frac{g(T)^2}{\ell(T)}$ . This allows us to apply the Azuma-Hoeffding inequality listed in Section 2.2, giving that

$$\begin{aligned} \sum_{t=1}^T \text{regret}'(t) &\leq \sum_{t=1}^T \left( \frac{g(T)}{p} I(\bar{a}_t \notin C(t)) z_{t,\bar{a}_t^*} \right) + \frac{2g(T)}{pT} + \frac{2g(T)^2}{\ell(T)} \sum_{t=1}^T z_{t,\bar{a}_t} + \frac{8}{p} \frac{g(T)^2}{\ell(T)} \sqrt{2T \log \frac{2}{\delta}} \\ &\leq \sum_{t=1}^T \left( \frac{g(T)^2}{\ell(T)} \frac{1}{p} I(\bar{a}_t \notin C(t)) z_{t,\bar{a}_t} \right) + \frac{2g(T)}{pT} + \frac{2g(T)^2}{\ell(T)} \sum_{t=1}^T z_{t,\bar{a}_t} + \frac{8}{p} \frac{g(T)^2}{\ell(T)} \sqrt{2T \log \frac{2}{\delta}} \\ &\leq \frac{g(T)^2}{\ell(T)} \frac{3}{p} \sum_{t=1}^T z_{t,\bar{a}_t} + \frac{2g(T)}{pT} + \frac{8}{p} \frac{g(T)^2}{\ell(T)} \sqrt{2T \log \frac{2}{\delta}}. \end{aligned}$$

with probability at least  $1 - \delta/2$ , where we recall that if  $\bar{a}_t \notin C(t)$ , then  $g(T) z_{t,\bar{a}_t} \geq \ell(T) z_{t,\bar{a}_t^*}$ .

Substituting in the bound  $\sum_{t=1}^T z_{t,\bar{a}_t} \leq \frac{5}{C_\pi} \sqrt{dT \log T}$  from Lemma 7 and the definitions of  $g(T), p, \ell(T)$ , we obtain that

$$\sum_{t=1}^T \text{regret}'(t) \leq \frac{C'}{C_\pi} \left( \frac{d^2}{\epsilon} \sqrt{T^{1+\epsilon}} \log \frac{1}{\delta} \log(Td) \right)$$

with probability at least  $1 - \frac{\delta}{2}$ , where  $C'$  is a constant. Recall that by Lemma 2,  $E^\mu(t)$  holds for all  $t$  with probability at least  $1 - \delta/2$ , and that  $\text{regret}'(t) = (s_{t,\bar{a}_t^*}^T \theta - s_{t,\bar{a}_t}^T \theta)$  whenever  $E^\mu(t)$  holds. By the union bound we then have that

$$II = \sum_{t=1}^T (s_{t,\bar{a}_t^*}^T \theta - s_{t,\bar{a}_t}^T \theta) \leq \frac{C'}{C_\pi} \left( \frac{d^2}{\epsilon} \sqrt{T^{1+\epsilon}} \log \frac{1}{\delta} \log(Td) \right)$$

with probability at least  $1 - \delta$ . The lemma results.  $\square$

## 6 Proof of Lemma 9

*Proof.* To prove that  $Y_t$  is a super-martingale by the definition above, we need to prove that for all  $1 \leq t \leq T$  and any  $\mathcal{F}_{t-1}$ ,  $\mathbb{E}[Y_t - Y_{t-1} | \mathcal{F}_{t-1}] \leq 0$ .

We first consider filtrations  $\mathcal{F}_{t-1}$  for which  $E^\mu(t)$  holds. By the definition of  $\bar{a}_t$ ,  $s_{t,\bar{a}_t}^T \theta' \geq s_{t,\bar{a}_t^*}^T \theta'$ . Under  $E^\theta(t)$  and  $E^\mu(t)$  we then must have that for all  $i = 1, \dots, N$

$$\begin{aligned} s_{t,i}^T \theta &\geq s_{t,i}^T \theta' - g(T) z_{t,i} \\ &\geq s_{t,\bar{a}_t^*}^T \theta' - g(T) z_{t,i} \\ &\geq s_{t,\bar{a}_t^*}^T \theta - g(T) z_{t,\bar{a}_t^*} - g(T) z_{t,i}. \end{aligned}$$

Hence  $s_{t,\bar{a}_t^*}^T \theta - s_{t,\bar{a}_t}^T \theta \leq g(T)(z_{t,\bar{a}_t} + z_{t,\bar{a}_t^*})$ .

For  $\mathcal{F}_{t-1}$  such that  $E^\mu(t)$  holds, we then can write

$$\begin{aligned} \mathbb{E}[\text{regret}'(t) | \mathcal{F}_{t-1}] &= \mathbb{E}[(s_{t,\bar{a}_t^*}^T \theta - s_{t,\bar{a}_t}^T \theta) | \mathcal{F}_{t-1}] \\ &\geq \mathbb{E}[g(T)(z_{t,\bar{a}_t} + z_{t,\bar{a}_t^*}) | \mathcal{F}_{t-1}] + \mathbb{P}(\overline{E^\theta(t)}) \\ &= g(T) z_{t,\bar{a}_t^*} \mathbb{P}(\bar{a}_t \in C(t) | \mathcal{F}_{t-1}) + g(T) \mathbb{E} \left[ \left( \frac{g(T)}{\ell(T)} z_{t,\bar{a}_t} I(\bar{a}_t \notin C(t)) \right) | \mathcal{F}_{t-1} \right] \\ &\quad + g(T) \mathbb{E}[z_{t,\bar{a}_t} | \mathcal{F}_{t-1}] + \frac{1}{T^2}. \end{aligned}$$

where we have used the facts that  $\text{regret}'(t) \leq 1$ , the definition of unsaturated arms, and Lemma 2. Applying Lemma 5 and noting that since  $\min \text{eig}(B(t)) \leq 1$ ,  $z_{t,i} \leq \|s_{t,i}\|_2 \leq 1$ , we can show that

$$\mathbb{E}[\text{regret}'(t) | \mathcal{F}_{t-1}] \leq \frac{g(T)}{p} \mathbb{P}(\bar{a}_t \notin C(t) | \mathcal{F}_{t-1}) z_{t,\bar{a}_t^*} + \frac{2g(T)}{pT^2}. \quad (4)$$

By definition,  $\text{regret}'(t) = (s_{t,\bar{a}_t}^T \theta - s_{t,\bar{a}_t}^T \theta) I(E^\mu(t))$  is zero and the above inequality holds whenever  $E^\mu(t)$  is not true. Since we have considered both cases, the lemma is proved.  $\square$

## 7 Proof of Lemma 2

*Proof.* We can apply Lemma 8 with  $m_t = \sqrt{\pi_t(1 - \pi_t)} s_{t,\bar{a}_t}$ ,

$$\eta_t = \frac{\hat{r}_t(\bar{a}_t)}{\sqrt{\pi_t(1 - \pi_t)}} - \sqrt{\pi_t(1 - \pi_t)} s_{t,\bar{a}_t}^T \theta,$$

and with the filtration  $\mathcal{F}'_t = (\bar{s}_{\tau+1}, m_{\tau+1}, \eta_\tau : \tau \leq t)$  effectively containing all the available information up to the current time.  $\mathcal{F}'_{t-1}$  is measurable by definition, and in Section 7.1 we show

**Lemma 10.** *Suppose that  $n_t$  is  $R$  sub-Gaussian. Then  $\eta_t$  is a  $\mathcal{F}'_t$ -measurable,  $R'$ -sub-Gaussian, martingale difference process where  $R' = \frac{R+2}{\sqrt{\pi_{\min}(1 - \pi_{\max})}} + \sqrt{\pi_{\max}(1 - \pi_{\min})}$ .*

We then have

$$\begin{aligned} M_t &= I_d + \sum_{\tau=1}^t m_\tau m_\tau^T = I_d + \sum_{\tau=1}^t \pi_\tau(1 - \pi_\tau) s_{\tau,\bar{a}_\tau} s_{\tau,\bar{a}_\tau}^T, \\ \xi_t &= \sum_{\tau=1}^t m_\tau \eta_\tau = \sum_{\tau=1}^t s_{\tau,\bar{a}_\tau} (\hat{r}_\tau(\bar{a}_\tau) - \pi_\tau(1 - \pi_\tau) s_{\tau,\bar{a}_\tau}^T \theta). \end{aligned}$$

Observe that these are the two primary components of the contextual bandit, specifically,  $B_t = M_{t-1}$  and  $b_t - \mathbb{E}[b_t] = \xi_t$ . Hence,  $\hat{\theta}_t - \theta = M_{t-1}^{-1}(\xi_t - \theta)$ . Letting  $\|y\|_A = \sqrt{y^T A y}$  for any vector  $y$  and matrix  $A \in \mathbb{R}^{d \times d}$ , for all  $\bar{a} > 0$  we have that since  $M_t$  is positive definite,

$$\begin{aligned} |s_{\bar{a},t}^T \hat{\theta} - s_{\bar{a},t}^T \theta| &= |s_{\bar{a},t}^T M_{t-1}^{-1}(\xi_{t-1} - \theta)| \\ &\leq \|s_{\bar{a},t}\|_{M_{t-1}^{-1}} \|\xi_{t-1} - \theta\|_{M_{t-1}^{-1}} \\ &= \|s_{\bar{a},t}\|_{B_t^{-1}} \|\xi_{t-1} - \theta\|_{B_t^{-1}}. \end{aligned}$$

Applying Lemma 8, we have that for any  $\delta' > 0$ ,  $t \geq 1$ ,

$$\|\xi_{t-1}\|_{M_{t-1}^{-1}} \leq R' \sqrt{d \log \frac{t}{\delta'}}.$$

Then  $\|\xi_{t-1} - \theta\|_{M_{t-1}^{-1}} \leq R' \sqrt{d \log \frac{t}{\delta'}} + \|\theta\|_{M_{t-1}^{-1}} \leq R' \sqrt{d \log \frac{T}{\delta'}} + 1$ . Setting  $\delta' = \delta/T^2$  implies that with probability  $1 - \delta/T^2$ , for all  $\bar{a}$ ,

$$|s_{\bar{a},t}^T \hat{\theta} - s_{\bar{a},t}^T \theta| \leq \|s_{\bar{a},t}\|_{B_t^{-1}} \left( R' \sqrt{d \log(T^3) \log \frac{1}{\delta}} + 1 \right) = \ell(T) z_{t,\bar{a}}.$$

$\square$

## 7.1 Proof of Lemma 10: Martingale analysis of $\eta_t$

*Proof.* Recall

$$\begin{aligned}
|\eta_t| &= \left| \frac{\hat{r}_t(\bar{a}_t)}{\sqrt{\pi_t(1-\pi_t)}} - \sqrt{\pi_t(1-\pi_t)} s_{t,\bar{a}_t}^T \theta \right| \\
&= \left| \frac{(I(a_t > 0) - \pi_t) r_t(a_t)}{\sqrt{\pi_t(1-\pi_t)}} - \sqrt{\pi_t(1-\pi_t)} s_{t,\bar{a}_t}^T \theta \right| \\
&= \left| \frac{(I(a_t > 0) - \pi_t)(s_{t,a_t}^T \theta I(a_t > 0) + n_t + \bar{f}_t(\bar{s}_t))}{\sqrt{\pi_t(1-\pi_t)}} - \sqrt{\pi_t(1-\pi_t)} s_{t,\bar{a}_t}^T \theta \right| \\
&\leq \sqrt{\pi_t(1-\pi_t)} + \left| \frac{2 + n_t}{\sqrt{\pi_t(1-\pi_t)}} \right|.
\end{aligned}$$

since the rewards are all bounded by one and the  $\pi_{\min} \leq \pi_t \leq \pi_{\max}$  are bounded. We have assumed that  $n_t$  is R sub-Gaussian. Since a bounded random variable  $|X| < b$  is  $b$  sub-Gaussian and the sum of independent  $b_1$  and  $b_2$  sub-Gaussian random variables is  $b_1 + b_2$  sub-Gaussian, we have that  $\eta_t$  is  $R' = \frac{R+2}{\sqrt{\pi_{\max}(1-\pi_{\min})}} + \sqrt{\pi_{\min}(1-\pi_{\max})}$  conditionally sub-Gaussian. Since  $\pi_{\min}, \pi_{\max}$  are bounded away from 0 and 1 by constants,  $R'$  is a constant.

Additionally, for all  $\bar{a}_t$

$$\begin{aligned}
\mathbb{E}[\eta_t | \mathcal{H}_{t-1}, \bar{a}_t, \bar{s}_t] &= \frac{\mathbb{E}[\hat{r}_t(\bar{a}_t) | \mathcal{H}_{t-1}, \bar{a}_t, \bar{s}_t]}{\sqrt{\pi_t(1-\pi_t)}} - \sqrt{\pi_t(1-\pi_t)} s_{t,\bar{a}_t}^T \theta \\
&= \frac{\mathbb{E}[(I(a_t > 0) - \pi_t) r_t(a_t) | \mathcal{H}_{t-1}, \bar{a}_t, \bar{s}_t]}{\sqrt{\pi_t(1-\pi_t)}} - \sqrt{\pi_t(1-\pi_t)} s_{t,\bar{a}_t}^T \theta \\
&= \frac{\pi_t(1-\pi_t) s_{t,\bar{a}_t}^T \theta}{\sqrt{\pi_t(1-\pi_t)}} - \sqrt{\pi_t(1-\pi_t)} s_{t,\bar{a}_t}^T \theta \\
&= 0,
\end{aligned}$$

where the third equality follows from (4). Thus  $\mathbb{E}[\eta_t | \mathcal{H}_{t-1}, \bar{s}_t] = 0$  and  $\eta_t$  is a martingale difference process. □

## References

- Abbasi-Yadkori, Yasin, Pál, Dávid, and Szepesvári, Csaba. Improved algorithms for linear stochastic bandits. In *Advances in Neural Information Processing Systems*, pp. 2312–2320, 2011.
- Agrawal, Shipra and Goyal, Navin. Thompson sampling for contextual bandits with linear payoffs. In *Proceedings of the 30th International Conference on Machine Learning (ICML-13)*, pp. 127–135, 2013.
- Auer, Peter, Cesa-Bianchi, Nicolo, Freund, Yoav, and Schapire, Robert E. The nonstochastic multiarmed bandit problem. *SIAM Journal on Computing*, 32(1):48–77, 2002.
- Chu, Wei, Li, Lihong, Reyzin, Lev, and Schapire, Robert E. Contextual bandits with linear payoff functions. In *International Conference on Artificial Intelligence and Statistics*, pp. 208–214, 2011.
